# Supplementary material
Source: PubMed Central journal article supplement (PMC7426582)

**A**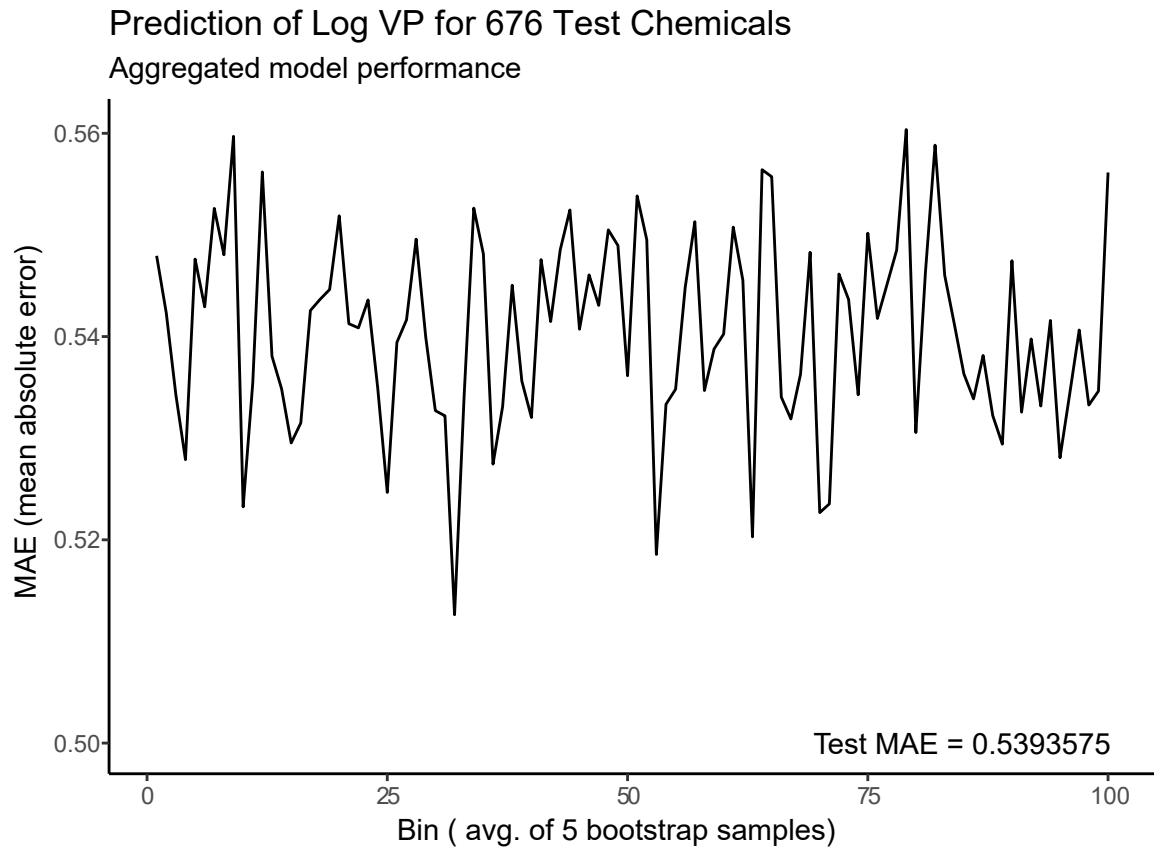**B**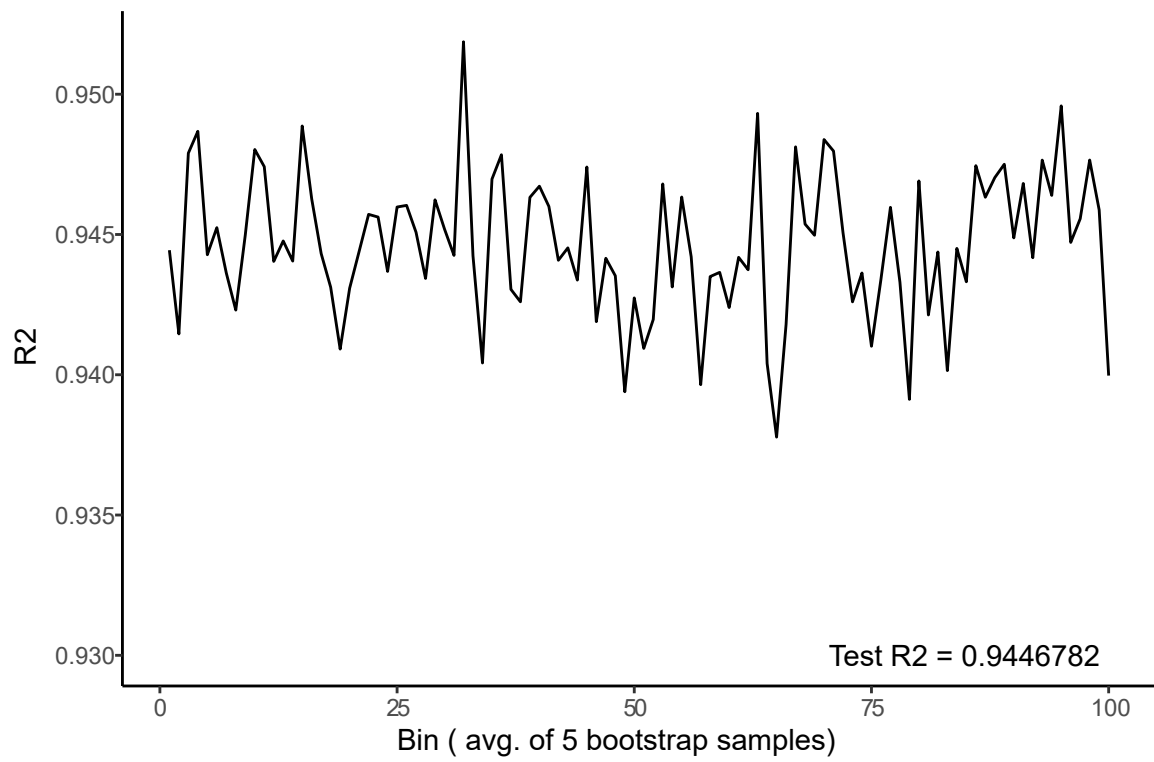**Supplementary Figure 1**

Supplement: mmc1.pdf [file mmc1.pdf]

A

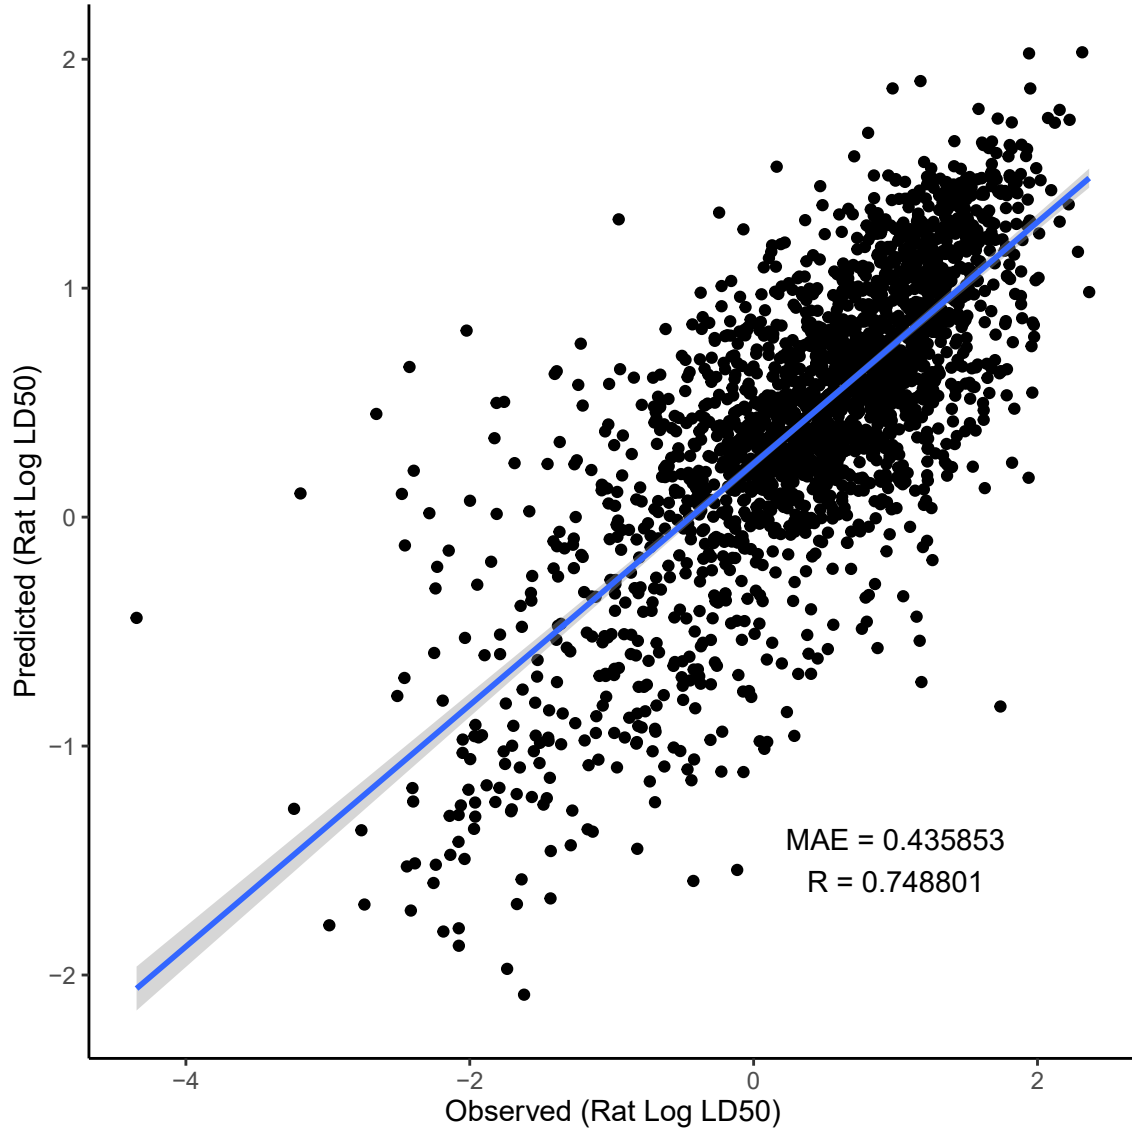

Supplementary Figure 2

Supplement: mmc2.pdf [file mmc2.pdf]
